# Supplementary material for: Myogenic differentiation potential of chicken mesenchymal stem cells from bone marrow
Source: Research Square preprint supplement (doi:10.21203/rs.3.rs-847240/v1), 2021-09-15
Supplement: Supplementary file 1 [file aa986d48f55558457bbf46d0.docx]

**Table S1** Primers used in the study.

| **Gene** | **Primers sequence（5'---3'）** | **Product length (bp)** | **Usage** |
| --- | --- | --- | --- |
| *CD71* | F: CCCAGGCTTCCCTTCGT  R: GGGCTCCAATCACAACATAC | 305 | RT-PCR |
| *CD90* | F: TCAGTGAGAGTGGGGAGAGG  R: GGGCTCCAATCACAACATAC | 181 | RT-PCR |
| *CD29* | F: GAACGGACAGATATGCAACGG  R: TAGAACCAGCAGTCACCAACG | 300 | RT-PCR |
| *CD44* | F: CATCGTTGCTGCCCTCCT  R: ACCGCTACACTCCACTCTTCAT | 290 | RT-PCR |
| *CD45* | F: CACTGGGAATCGAGAGGAAA  R: CTGGTCTGGATGGCACTTTT | 574 | RT-PCR |
| *GAPDH* | F: CAACTTTGGCATTGTGGAGG  R: CGCTGGGATGATGTTCTGG | 130 | qPCR and RT-PCR |
| *Desmin* | F: GCTCAATGTCAAGATGGCCC  R: CTGGGCTGGTCTCTCGGAAA | 134 | qPCR |
| *MyHc* | F: CTCCTCACGCTTTGGTAA  R: TGATAGTCGTATGGGTTGGT | 213 | qPCR |
| *Myomaker* | F: TGGGTGTCCCTGATGGC  R: CCCGATGGGTCCTGAGTAG | 135 | qPCR |
| *MyoD1* | F: CGACGGCATGATGGAGTAC  R: CAGTCGAGGCTGGAAACAA | 90 | qPCR |
| *MyoG* | F: AACCAGCAGGAGCGTGAGC  R: CTGGGTGCAGCAGGTTGTG | 68 | qPCR |
